# Supplementary material for: IL-1 Superfamily Member (IL-1A, IL-1B and IL-18) Genetic Variants Influence Susceptibility and Clinical Course of Mediterranean Spotter Fever
Source: MDPI journal article supplement (doi:10.3390/biom12121892), 2022-12-17
Supplement: s1 [file s1]

**Table S1.** Analysis of SNP frequencies in patients affected by Mediterranean Spotted Fever (MSF) complicated with Acute Respiratory Distress Syndrome (ARDS) compared to MSF without ARDS (w/oARDS) and Healthy Controls (adjusted by 64 years Age cut off and Gender).

| Genes and SNP Alleles             |     | ARDS |       | w/oARDS |       | Controls |       | ARDS Vs w/oARDS       |         | ARDS Vs Controls    |                      |
|-----------------------------------|-----|------|-------|---------|-------|----------|-------|-----------------------|---------|---------------------|----------------------|
|                                   |     | N.   | Freq. | N.      | Freq. | N.       | Freq. | OR (95% CI)           | p Value | OR (95% CI)         | p Value              |
| <i>TIRAP</i><br><i>rs8177374</i>  | C/C | 12   | 0.80  | 122     | 0.84  | 178      | 0.86  | 0.75<br>(0.20-2.88)   | 0.713   | 0.63<br>(0.17-2.37) | 0.448                |
|                                   | C/T | 3    | 0.20  | 20      | 0.14  | 22       | 0.11  | 1.66<br>(0.42-6.57)   | 0.49    | 2.24<br>(0.56-8.98) | 0.28                 |
|                                   | T/T | 0    | -     | 3       | 0.02  | 6        | 0.03  | --                    | --      | --                  | --                   |
| <i>IL-18 *</i><br><i>rs187238</i> | C/C | 2    | 0.13  | 80      | 0.55  | 102      | 0.5   | 0.12<br>(0.03- 0.57)  | 0.0021  | 0.16<br>(0.03-0.71) | 0.0069               |
|                                   | C/G | 13   | 0.87  | 54      | 0.37  | 84       | 0.41  | 12.86<br>(2.68-61.70) | <0.0001 | 9.28<br>(2.01-42.8) | 5 × 10 <sup>-4</sup> |
|                                   | G/G | 0    | -     | 11      | 0.08  | 20       | 0.1   |                       | -       | --                  | -                    |
| <i>IL 1A</i><br><i>rs1800587</i>  | C/C | 7    | 0.47  | 62      | 0.43  | 100      | 0.49  | 1.17<br>(0.40-3.40)   | 0.790   | 0.93<br>(0.32-2.66) | 1.00                 |
|                                   | C/T | 8    | 0.53  | 50      | 0.34  | 87       | 0.42  | 2.08<br>(0.70-6.20)   | 0.189   | 1.65<br>(0.56-4.80) | 0.36                 |
|                                   | T/T | 0    | -     | 33      | 0.23  | 19       | 0.09  | --                    | -       | --                  | -                    |
| <i>IL1B</i><br><i>rs16944</i>     | G/G | 8    | 0.53  | 57      | 0.39  | 87       | 0.42  | 1.76<br>(0.61-5.13)   | 0.408   | 1.56<br>(0.55-4.47) | 0.429                |
|                                   | G/A | 7    | 0.47  | 65      | 0.45  | 98       | 0.48  | 1.08<br>(0.37-3.18)   | 0.891   | 0.84<br>(0.29-2.45) | 0.75                 |
|                                   | A/A | 0    | -     | 23      | 0.16  | 21       | 0.1   | --                    | -       | --                  | -                    |
| <i>IL1B</i><br><i>rs1143634</i>   | C/C | 9    | 0.60  | 72      | 0.50  | 108      | 0.52  | 1.52<br>(0.51-4.49)   | 0.589   | 1.36<br>(0.47-3.96) | 0.604                |
|                                   | C/T | 6    | 0.40  | 52      | 0.36  | 81       | 0.39  | 1.38<br>(0.45-4.22)   | 0.571   | 1.08<br>(0.36-3.21) | 0.89                 |
|                                   | T/T | 0    | -     | 21      | 0.14  | 17       | 0.08  | --                    | -       | --                  | -                    |

Number (N.) frequency (Freq.) odd ratio (OR) and 95% Confidence Interval (95% CI) have been reported.

\* Dominant model: ARDS Vs w/oARDS OR: 10.99 (2.29-52.69) p<0.0003; ARDS Vs Controls OR: 6.23 (1.35-28.74) p = 0.0054.

**Table S2.** Analysis of SNP frequencies in patients affected by Mediterranean Spotted Fever (MSF) complicated with Neurologic symptoms (N-Sympt) compared to MSF without N-Sympt (No- N-Sympt) and Healthy Controls (adjusted by 64 years Age cut off and Gender).

| Genes and SNP Alleles |     | Ne-Sympt |       | No- Ne-Sympt |       | Controls |       | NeSympt Vs No-Ne-Sympt |         | Ne-Sympt Vs Controls |         |
|-----------------------|-----|----------|-------|--------------|-------|----------|-------|------------------------|---------|----------------------|---------|
|                       |     | N.       | Freq. | N.           | Freq. | N.       | Freq. | OR (95% CI)            | p Value | OR (95% CI)          | p Value |
| TIRAP<br>rs8177374    | C/C | 19       | 0.91  | 115          | 0.83  | 178      | 0.86  | 1.98<br>(0.43-9.09)    | 0.532   | 1.49<br>(0.33-6.77)  | 1.00    |
|                       | C/T | 2        | 0.09  | 21           | 0.15  | 22       | 0.11  | 0.61<br>(0.13-2.86)    | 0.51    | 1.05<br>(0.22-5.03)  | 0.95    |
|                       | T/T | 0        | 0     | 3            | 0.02  | 6        | 0.03  | --                     | --      | --                   | --      |
| IL-18<br>rs187238     | C/C | 10       | 0.48  | 72           | 0.52  | 102      | 0.5   | 0.85<br>(0.34-2.12)    | 0.846   | 0.93<br>(0.38-2.28)  | 1.00    |
|                       | C/G | 9        | 0.43  | 58           | 0.42  | 84       | 0.41  | 1.11<br>(0.43-2.87)    | 0.83    | 1.03<br>(0.41-2.60)  | 0.95    |
|                       | G/G | 2        | 0.09  | 9            | 0.06  | 20       | 0.1   | 1.30<br>(0.25-6.63)    | 0.76    | 0.89<br>(0.19-4.21)  | 0.88    |
| IL 1A<br>rs1800587    | C/C | 7        | 0.333 | 62           | 0.45  | 100      | 0.49  | 0.62<br>(0.24-1.63)    | 0.357   | 0.53<br>(0.21-1.37)  | 0.252   |
|                       | C/T | 7        | 0.333 | 51           | 0.37  | 87       | 0.42  | 0.79<br>(0.29-2.11)    | 0.63    | 0.68<br>(0.26-1.79)  | 0.43    |
|                       | T/T | 7        | 0.333 | 26           | 0.19  | 19       | 0.09  | 2.47<br>(0.87-6.96)    | 0.098   | 6.03<br>(2.00-18.19) | 0.0024  |
| IL1B *<br>rs16944     | G/G | 3        | 0.14  | 62           | 0.44  | 87       | 0.42  | 0.21<br>(0.06- 0.73)   | 0.0085  | 0.23<br>(0.07-0.79)  | 0.0173  |
|                       | G/A | 18       | 0.86  | 54           | 0.39  | 98       | 0.48  | 9.83<br>(2.74-35.29)   | <0.0001 | 6.03<br>(1.71-21.33) | 0.0011  |
|                       | A/A | 0        | 0     | 23           | 0.17  | 21       | 0.1   | --                     | --      | --                   | --      |
| IL1B<br>rs1143634     | C/C | 12       | 0.57  | 69           | 0.50  | 108      | 0.52  | 1.35<br>(0.54-3.42)    | 0.641   | 1.21<br>(0.49-2.99)  | 0.819   |
|                       | C/T | 4        | 0.19  | 54           | 0.39  | 81       | 0.39  | 0.39<br>(0.12-1.22)    | 0.083   | 0.36<br>(0.12-1.13)  | 0.059   |
|                       | T/T | 5        | 0.24  | 16           | 0.11  | 17       | 0.08  | 2.40<br>(0.76-7.58)    | 0.16    | 3.56<br>(1.11-11.36) | 0.046   |

Number (N.) frequency (Freq.) odd ratio (OR) and 95% Confidence Interval (95% CI) have been reported.

\* N-Sympt Vs No- N-Sympt Dominant model (A/G-A/A Vs G/G) OR:5.02 (1.40-17.98), p = 0.0043; N-Sympt y Vs Controls Dominant model (A/G-A/A Vs G/G) OR: 3.82 (1.08-13.57) p = 0.019.

**Table S3.** Analysis of SNP frequencies in patients affected by Mediterranean Spotted Fever (MSF) complicated with Sepsis compared to MSF without Sepsis (no-Sepsis) and Healthy Controls (adjusted by 64 years Age cut off and Gender).

| Genes and SNP Alleles            |     | Sepsis |       | No- Sepsis |       | Controls |       | Sepsis Vs No- Sepsis |         | Sepsi Vs Controls    |         |
|----------------------------------|-----|--------|-------|------------|-------|----------|-------|----------------------|---------|----------------------|---------|
|                                  |     | N.     | Freq. | N.         | Freq. | N.       | Freq. | OR (95% CI)          | p Value | OR (95% CI)          | p Value |
| <i>TIRAP</i><br><i>rs8177374</i> | C/C | 14     | 0.82  | 120        | 0.84  | 178      | 0.86  | 0.89<br>(0.24-3.36)  | 1.00    | 0.73<br>(0.20-2.72)  | 0.713   |
|                                  | C/T | 3      | 0.18  | 20         | 0.14  | 22       | 0.11  | 1.40<br>(0.36-5.38)  | 0.64    | 2.19<br>(0.55-8.76)  | 0.29    |
|                                  | T/T | 0      | 0     | 3          | 0.02  | 6        | 0.03  | --                   | -       | --                   | -       |
| <i>IL-18</i><br><i>rs187238</i>  | C/C | 9      | 0.53  | 73         | 0.51  | 102      | 0.5   | 1.08<br>(0.39-2.95)  | 1.00    | 1.15<br>(0.43-3.09)  | 0.807   |
|                                  | C/G | 7      | 0.41  | 60         | 0.42  | 84       | 0.41  | 1.05<br>(0.37-3.00)  | 0.92    | 0.91<br>(0.33-2.56)  | 0.87    |
|                                  | G/G | 1      | 0.06  | 10         | 0.07  | 20       | 0.1   | 0.69<br>(0.08-5.88)  | 0.72    | 0.54<br>(0.07-4.37)  | 0.53    |
| <i>IL 1A</i><br><i>rs1800587</i> | C/C | 5      | 0.30  | 64         | 0.45  | 100      | 0.49  | 0.51<br>(0.17-1.54)  | 0.303   | 0.44<br>(0.15-1.30)  | 0.205   |
|                                  | C/T | 6      | 0.35  | 52         | 0.36  | 87       | 0.42  | 0.86<br>(0.29-2.50)  | 0.78    | 0.75<br>(0.26-2.14)  | 0.59    |
|                                  | T/T | 6      | 0.35  | 27         | 0.19  | 19       | 0.09  | 2.75<br>(0.90-8.42)  | 0.087   | 6.97<br>(2.09-23.20) | 0.0027  |
| <i>IL1B</i><br><i>rs16944</i>    | G/G | 3      | 0.18  | 62         | 0.43  | 87       | 0.42  | 0.28<br>(0.08-1.01)  | 0.065   | 0.29<br>(0.08-1.05)  | 0.069   |
|                                  | G/A | 14     | 0.82  | 58         | 0.41  | 98       | 0.48  | 7.04<br>(1.92-25.82) | <0.0007 | 4.65<br>(1.28-16.88) | 0.0087  |
|                                  | A/A | 0      | 0     | 23         | 0.16  | 21       | 0.1   | --                   | -       | --                   | -       |
| <i>IL1B</i><br><i>rs1143634</i>  | C/C | 10     | 0.59  | 71         | 0.50  | 108      | 0.52  | 1.45<br>(0.52-4.02)  | 0.609   | 1.30<br>(0.50-3.54)  | 0.801   |
|                                  | C/T | 2      | 0.12  | 56         | 0.39  | 81       | 0.39  | 0.21<br>(0.05-0.96)  | 0.019   | 0.21<br>(0.05-0.96)  | 0.018   |
|                                  | T/T | 5      | 0.29  | 16         | 0.11  | 17       | 0.08  | 3.42<br>(1.04-11.26) | 0.056   | 4.75<br>(1.43-15.84) | 0.018   |

Number (N.) frequency (Freq.) odd ratio (OR) and 95% Confidence Interval (95% CI) have been reported.

**Table S4.** Analysis of SNP frequencies in patients affected by Mediterranean Spotted Fever (MSF) complicated with Septic shock (Sept-Sh) compared to MSF without Sept-Sh (no- Sept-Sh) and Healthy Controls (adjusted by 64 years Age cut off and Gender).

| Genes and SNP Alleles             |     | Sept-Sh |       | No- Sept-Sh |       | Controls |       | Sept-Sh Vs No-Sept-Sh |         | Sept-Sh Vs Controls  |         |
|-----------------------------------|-----|---------|-------|-------------|-------|----------|-------|-----------------------|---------|----------------------|---------|
|                                   |     | N.      | Freq. | N.          | Freq. | N.       | Freq. | OR (95% CI)           | p Value | OR (95% CI)          | p Value |
| <i>TIRAP</i><br><i>rs8177374</i>  | C/C | 13      | 0.87  | 121         | 0.84  | 178      | 0.86  | 1.29<br>(0.273-6.09)  | 1.00    | 1.02<br>(0.22- 4.78) | 1.00    |
|                                   | C/T | 2       | 0.13  | 21          | 0.14  | 22       | 0.11  | 0.96<br>(0.20-4.67)   | 0.96    | 1.68<br>(0.33-8.52)  | 0.55    |
|                                   | T/T | 0       | -     | 3           | 0.02  | 6        | 0.03  | --                    | --      | --                   | --      |
| <i>IL-18</i><br><i>rs187238</i>   | C/C | 7       | 0.47  | 75          | 0.52  | 102      | 0.5   | 0.82<br>(0.28-2.37)   | 0.789   | 0.89<br>(0.31-2.55)  | 1.00    |
|                                   | C/G | 7       | 0.47  | 60          | 0.41  | 84       | 0.41  | 1.41<br>(0.47-4.22)   | 0.54    | 1.14<br>(0.39-3.35)  | 0.81    |
|                                   | G/G | 1       | 0.06  | 10          | 0.07  | 20       | 0.1   | 0.77<br>(0.09-6.66)   | 0.81    | 0.61<br>(0.07-5.02)  | 0.62    |
| <i>IL 1°*</i><br><i>rs1800587</i> | C/C | 3       | 0.20  | 66          | 0.45  | 100      | 0.49  | 0.30<br>(0.08- 1.11)  | 0.098   | 0.26<br>(0.07-0.97)  | 0.0351  |
|                                   | C/T | 6       | 0.40  | 52          | 0.36  | 87       | 0.42  | 1.05<br>(0.35-3.18)   | 0.93    | 0.92<br>(0.31-2.74)  | 0.88    |
|                                   | T/T | 6       | 0.40  | 27          | 0.19  | 19       | 0.09  | 3.65<br>(1.13-11.77)  | 0.036   | 9.25<br>(2.59-33.01) | 0.001   |
| <i>IL1B #</i><br><i>rs16944</i>   | G/G | 2       | 0.13  | 63          | 0.44  | 87       | 0.42  | 0.20<br>(0.04-0.92)   | 0.027   | 0.21<br>(0.05-0.96)  | 0.03    |
|                                   | G/A | 13      | 0.87  | 59          | 0.41  | 98       | 0.48  | 9.86<br>(2.12-45.75)  | 0.0004  | 6.29<br>(1.37-28.98) | 0.0051  |
|                                   | A/A | 0       | -     | 23          | 0.16  | 21       | 0.1   | --                    | --      | --                   | --      |
| <i>IL1B</i><br><i>rs1143634</i>   | C/C | 8       | 0.53  | 73          | 0.50  | 108      | 0.52  | 1.13<br>(0.3-3.27)    | 1.00    | 1.04<br>(0.36-2.97)  | 1.00    |
|                                   | C/T | 2       | 0.13  | 56          | 0.39  | 81       | 0.39  | 0.25<br>(0.05-1.08)   | 0.087   | 0.24<br>(0.05-1.13)  | 0.054   |
|                                   | T/T | 5       | 0.34  | 16          | 0.11  | 17       | 0.08  | 4.27<br>(1.25-14.61)  | 0.029   | 5.84<br>(1.68-18.14) | 0.0097  |

Number (N.) frequency (Freq.) odd ratio (OR) and 95% Confidence Interval (95% CI) have been reported.

\* Sept-Sh Vs Controls Dominant model (G/C-C/C Vs G/G) OR: 4.23 (1.13-15.85), p = 0.018.

# Sept-Sh Vs No- Sept-Sh Dominant model (G/C-C/C Vs G/G) OR: 5.19 (1.12-24.04) p = 0.014;

Sept-Sh Vs Controls Dominant model (G/C-C/C Vs G/G) OR: 3.92 (0.85-18.13) p = 0.046.

**Table S5.** Analysis of SNP frequencies in patients affected by Mediterranean Spotted Fever (MSF) complicated with Coma compared to MSF without Coma (no-Coma) and Healthy Controls (adjusted by 64 years Age cut off and Gender).

| Genes and SNP Alleles            |     | Coma |       | No-Coma |       | Controls |       | Coma Vs No-Coma      |         | Coma Vs Controls     |         |
|----------------------------------|-----|------|-------|---------|-------|----------|-------|----------------------|---------|----------------------|---------|
|                                  |     | N.   | Freq. | N.      | Freq. | N.       | Freq. | OR (95% CI)          | p Value | OR (95% CI)          | p Value |
| <i>TIRAP</i><br><i>rs8177374</i> | C/C | 6    | 0.75  | 128     | 0.84  | 178      | 0.86  | 0.56<br>(0.11-2.96)  | 0.617   | 0.47<br>(0.09-2.46)  | 0.316   |
|                                  | C/T | 2    | 0.25  | 21      | 0.14  | 22       | 0.11  | 2.18<br>(0.41-11.69) | 0.39    | 3.28<br>(0.58-18.41) | 0.21    |
|                                  | T/T | 0    | 0     | 3       | 0.02  | 6        | 0.03  | -                    | --      | --                   | --      |
| <i>IL-18</i><br><i>rs187238</i>  | C/C | 3    | 0.37  | 79      | 0.52  | 102      | 0.50  | 0.55<br>(0.13-2.40)  | 0.487   | 0.612<br>(0.14-2.63) | 0.722   |
|                                  | C/G | 5    | 0.63  | 62      | 0.41  | 84       | 0.41  | 2.56<br>(0.57-11.50) | 0.31    | 2.27<br>(0.52-9.95)  | 0.27    |
|                                  | G/G | 0    | -     | 11      | 0.07  | 20       | 0.10  | --                   | --      | --                   | --      |
| <i>IL 1A</i><br><i>rs1800587</i> | C/C | 0    | -     | 69      | 0.45  | 100      | 0.49  | --                   | --      | --                   | --      |
|                                  | C/T | 5    | 0.63  | 53      | 0.35  | 87       | 0.42  | 2.99<br>(0.68-13.27) | 0.14    | 2.36<br>(0.54-10.28) | 0.24    |
|                                  | T/T | 3    | 0.37  | 30      | 0.20  | 19       | 0.09  | 2.68<br>(0.58-12.30) | 0.22    | 9.00<br>(1.75-46.30) | 0.015   |
| <i>IL1B</i><br><i>rs16944</i>    | G/G | 1    | 0.13  | 64      | 0.42  | 87       | 0.42  | 0.19<br>(0.02-1.64)  | 0.144   | 0.195<br>(0.02-1.62) | 0.145   |
|                                  | G/A | 7    | 0.87  | 65      | 0.43  | 98       | 0.48  | 9.52<br>(1.14-79.70) | 0.0096  | 6.90<br>(0.83-57.64) | 0.03    |
|                                  | A/A | 0    | -     | 23      | 0.15  | 21       | 0.10  | --                   | --      | --                   | --      |
| <i>IL1B</i><br><i>rs1143634</i>  | C/C | 5    | 0.62  | 76      | 0.50  | 108      | 0.52  | 1.67<br>(0.38-7.22)  | 0.720   | 1.51<br>(0.35-6.49)  | 0.725   |
|                                  | C/T | 1    | 0.13  | 57      | 0.37  | 81       | 0.39  | 0.25<br>(0.03-2.15)  | 0.15    | 0.23<br>(0.03-1.91)  | 0.11    |
|                                  | T/T | 2    | 0.25  | 19      | 0.13  | 17       | 0.08  | 2.24<br>(0.41-12.13) | 0.38    | 4.06<br>(0.73-22.48) | 0.15    |

Number (N.) frequency (Freq.) odd ratio (OR) and 95% Confidence Interval (95% CI) have been reported.
